# Supplementary material for: Tea cultivar classification and biochemical parameter estimation from hyperspectral imagery obtained by UAV
Source: PeerJ. 2018 May 28;6:e4858. doi: 10.7717/peerj.4858 (PMC5978401; doi:10.7717/peerj.4858)
Supplement: Supplemental Information 1 [file peerj-06-4858-s001.xlsx]

## Sheet: cover
	contents of worksheets:
	water content of fresh leaves
	water content of dry tea
	tea polyphenols concentration
	amino acid concentration

## Sheet: water content of fresh leaves
	water content of fresh leaves
	sample number	sample weight (g)	dry sample weight (g)	water content of fresh leaves%
	1	28.14	13.07	53.5537
	2	12.53	5.75	54.1101
	3	51.23	21.56	57.9153
	4	36.8	16.38	55.4891
	5	50.19	21.28	57.6011
	6	46.82	20.69	55.8095
	7	44.21	18.78	57.5209
	8	35.46	15.6	56.0068
	9	41.12	17.66	57.0525
	10	44.35	19.8	55.3551
	11	40.6	18.32	54.8768
	12	23.29	9.98	57.149
	13	38.32	16.92	55.8455
	14	31.32	14.01	55.2682
	15
	16	18.9	7.74	59.0476
	17	31.31	13.56	56.6912
	18	17.89	7.72	56.8474
	19	22.88	10.42	54.458
	20	17.16	7.37	57.0513
	21	21.56	9.22	57.2356
	22	18.52	8.39	54.6976
	23	16.81	7.37	56.157
	24	13.98	6.06	56.6524
	25	19.31	8.57	55.6189
	26	18.74	8.01	57.2572
	27	26.88	11.83	55.9896
	28	15.33	6.71	56.2296
	29	22.17	10.45	52.8642
	30	21.19	10.3	51.3922
	31	24.66	11.08	55.0689
	32	22.2	9.49	57.2523
	33	21.74	10.33	52.4839
	34	17.45	8.41	51.8052
	35	31	14.22	54.129
	36	23.18	11.08	52.2002
	37	25.54	12.27	51.9577
	38	29.75	13.29	55.3277
	39	33.45	14.76	55.8744
	40	23.94	10.78	54.9708
	41	29.51	13.44	54.4561
	42	28.45	12.86	54.7979
	43	30.01	14.32	52.2826
	44	27.61	12.94	53.1329
	45	27.23	11.7	57.0327
	46	25.74	12.41	51.7871
	47	47.61	22.49	52.762
	48	42.19	21.01	50.2015
	49	35.57	17.15	51.7852
	50	21.59	11.02	48.9579
	51	38.53	16.89	56.164
	52	35.24	14.91	57.6901
	53	45.55	19.26	57.7168
	54	33.67	15.43	54.1729
	55	49.56	21.33	56.9613
	56	24.69	10.83	56.1361
	57	29.3	13.38	54.3345
	58	22.5	9.82	56.3556
	59	25.7	12.14	52.7626
	60	26.58	11.89	55.2671
	61	30.32	13.88	54.2216
	62	29.75	13.86	53.4118
	63	35.6	15.93	55.2528
	64	27.55	11.81	57.1325
	65	35.81	16.7	53.365
	66	25.58	12.51	51.0946
	67	36.84	16.63	54.8588
	68	28.72	13.77	52.0543
	69	39.33	17.15	56.3946
	70	37.92	17.2	54.6414
	71	44.54	19.96	55.1863
	72	30.3	13.07	56.8647
	73	28.07	12.38	55.896
	74	23.93	9.79	59.089
	75	29.74	12.05	59.4822
	76	22.2	9.22	58.4685
	77	41.37	19.26	53.4445
	78	30.87	12.43	59.7344
	79	29.52	13.08	55.6911
	80	39.88	17.49	56.1434
	81	46.76	19.34	58.6399
	82	37.43	16.54	55.8108
	83	39.66	18.27	53.9334
	84	40.11	18.19	54.6497
	85	44.68	19.69	55.9311
	86	43.79	18.92	56.7938

## Sheet: water content of dry tea
	water content of dry tea
	sample number	Aluminium case weight	total weight of Aluminium case and tea sample (g)	dry sample weight (g)	Water content of dry tea (%)	dry matter weight(%)
	1	14.2802	16.0557	16.0015	3.05266	96.9473
	2	14.0902	16.9573	16.8961	2.13456	97.8654
	3	14.1519	16.4636	16.3732	3.91054	96.0895
	4	13.9433	15.762	15.7061	3.07362	96.9264
	5	14.4993	16.4911	16.4226	3.4391	96.5609
	6	15.5322	17.4027	17.3483	2.90831	97.0917
	7	14.5551	16.5276	16.4766	2.58555	97.4144
	8	13.9814	15.3876	15.3416	3.27123	96.7288
	9	13.8427	15.5486	15.5046	2.57928	97.4207
	10	14.6324	16.8731	16.7938	3.53907	96.4609
	11	13.5752	15.7762	15.7165	2.7124	97.2876
	12	15.7571	17.4659	17.4095	3.30056	96.6994
	13	15.4742	17.3781	17.3289	2.58417	97.4158
	14	14.2216	15.6743	15.6345	2.73973	97.2603
	15	13.8162	15.8109	15.7609	2.50664	97.4934
	16	13.9482	16.0854	16.0159	3.25192	96.7481
	17	15.0877	16.7766	16.7401	2.16117	97.8388
	18	15.7794	18.0356	17.9858	2.20725	97.7927
	19	15.2903	17.2761	17.238	1.91862	98.0814
	20	14.5553	16.0721	16.0207	3.38871	96.6113
	21	14.2802	16.0497	15.9815	3.8542	96.1458
	22	14.0902	15.9573	15.8966	3.25103	96.749
	23	14.1519	15.4636	15.4232	3.07997	96.92
	24	13.9433	15.762	15.7062	3.06813	96.9319
	25	14.4993	15.9911	15.9566	2.31264	97.6874
	26	15.5322	17.4027	17.3483	2.90831	97.0917
	27	14.5551	16.1276	16.0832	2.82353	97.1765
	28	13.9814	15.3198	15.2716	3.60132	96.3987
	29	13.8427	15.5486	15.5057	2.5148	97.4852
	30	14.6324	16.9231	16.8658	2.50142	97.4986
	31	13.5752	15.7752	15.7165	2.66818	97.3318
	32	15.7571	17.2459	17.2092	2.46507	97.5349
	33	15.4742	17.2881	17.2389	2.71239	97.2876
	34	14.2216	15.6748	15.6345	2.77319	97.2268
	35	13.8162	15.9109	15.8609	2.38698	97.613
	36	13.9482	16.0854	16.0159	3.25192	96.7481
	37	15.0877	16.6866	16.6469	2.48296	97.517
	38	15.7794	18.0342	17.9977	1.61877	98.3812
	39	15.2903	17.2761	17.238	1.91862	98.0814
	40	14.5553	16.0421	15.997	3.03336	96.9666
	41	15.4334	17.1067	17.0658	2.44427	97.5557
	42	14.2802	16.3429	16.2815	2.97668	97.0233
	43	14.0902	15.9555	15.8966	3.15767	96.8423
	44	14.1519	15.4721	15.4302	3.17376	96.8262
	45	13.9433	15.7762	15.7162	3.2735	96.7265
	46	14.4993	16.1361	16.0896	2.84091	97.1591
	47	15.5322	17.2097	17.1643	2.70641	97.2936
	48	14.5551	16.5576	16.4832	3.71536	96.2846
	49	13.9814	15.6498	15.5879	3.71014	96.2899
	50	13.8427	15.5776	15.5387	2.2422	97.7578
	51	14.6324	16.9242	16.8658	2.54822	97.4518
	52	13.5752	15.7801	15.7155	2.92984	97.0702
	53	15.7571	17.4759	17.4322	2.54247	97.4575
	54	15.4742	17.2981	17.2389	3.24579	96.7542
	55	14.2216	15.6751	15.6345	2.79326	97.2067
	56	13.8162	16.3009	16.2169	3.38069	96.6193
	57	13.9482	15.0854	15.0477	3.31516	96.6848
	58	15.0877	16.6906	16.6471	2.71383	97.2862
	59	15.7794	17.0342	16.9977	2.90883	97.0912
	60	15.2903	17.3061	17.2381	3.37335	96.6266
	61	14.6553	16.0801	16.0372	3.01095	96.9891
	62	15.4334	17.4267	17.3618	3.25591	96.7441
	63	14.2802	16.8433	16.7789	2.51258	97.4874
	64	14.0902	16.3709	16.3126	2.55623	97.4438
	65	14.1519	16.3394	16.2819	2.62857	97.3714
	66	13.9433	15.837	15.7785	3.08919	96.9108
	67	14.4993	16.9903	16.9204	2.8061	97.1939
	68	15.5322	17.2308	17.1791	3.04368	96.9563
	69	14.5551	16.9839	16.9135	2.89855	97.1014
	70	13.9814	16.0047	15.9474	2.83201	97.168
	71	13.8427	16.2031	16.1355	2.86392	97.1361
	72	14.6324	16.9835	16.9317	2.20322	97.7968
	73	13.5752	16.0042	15.9404	2.6266	97.3734
	74	15.7571	18.3206	18.2426	3.04272	96.9573
	75	15.4742	17.3379	17.2819	3.00478	96.9952
	76	14.2216	16.8387	16.7705	2.60594	97.3941
	77	13.8162	16.2394	16.1704	2.84747	97.1525
	78	13.9482	16.3659	16.3008	2.69264	97.3074
	79	15.0877	17.3398	17.2704	3.08157	96.9184
	80	15.7794	18.0158	17.9501	2.93776	97.0622
	81	15.2903	17.8392	17.7692	2.74628	97.2537
	82	14.5553	17.0382	16.9707	2.7186	97.2814
	83	15.4334	17.2904	17.2375	2.84868	97.1513
	84	14.2802	16.5986	16.5303	2.946	97.054
	85	14.0902	16.3305	16.2626	3.03084	96.9692
	86	14.1519	17.1303	17.0528	2.60207	97.3979

## Sheet: tea polyphenols content
	Repeat each sample 3 times
	Measurement of tea polyphenols									tea polyphenols content in dry tea
	sample number	tea powder weight (g)	dry matter weight (%)	absorbance	tea polyphenols content (mg/ml)	average content (g/kg)	tea polyphenols proportion (%)	average proportion (%)
	1	0.203	96.9473	0.474	91.231	91.0109	9.1231	9.10109			sample number	average content (g/kg)	average proportion (%)
		0.2	96.9473	0.475	92.7948		9.27948				1	91.0109	9.10109
		0.205	96.9473	0.467	89.0068		8.90068				2	84.2502	8.42502
	2	0.204	97.8654	0.449	85.1889	84.2502	8.51889	8.42502			3	94.0813	9.40813
		0.203	97.8654	0.438	83.5112		8.35112				4	93.9782	9.39782
		0.204	97.8654	0.443	84.0505		8.40505				5	85.7484	8.57484
	3	0.205	96.0895	0.487	93.6473	94.0813	9.36473	9.40813			6	89.0572	8.90572
		0.202	96.0895	0.478	93.2818		9.32818				7	76.4812	7.64812
		0.201	96.0895	0.486	95.3148		9.53148				8	73.6784	7.36784
	4	0.202	96.9264	0.492	95.1849	93.9782	9.51849	9.39782			9	88.8505	8.88505
		0.208	96.9264	0.49	92.0634		9.20634				10	105.044	10.5044
		0.201	96.9264	0.487	94.6863		9.46863				11	110.871	11.0871
	5	0.201	96.5609	0.44	85.872	85.7484	8.5872	8.57484			12	79.0605	7.90605
		0.202	96.5609	0.431	83.6991		8.36991				13	103.906	10.3906
		0.2	96.5609	0.447	87.6743		8.76743				14	104.326	10.4326
	6	0.203	97.0917	0.458	88.0204	89.0572	8.80204	8.90572			15
		0.201	97.0917	0.46	89.2844		8.92844				16	71.0465	7.10465
		0.201	97.0917	0.463	89.8667		8.98667				17	78.2053	7.82053
	7	0.202	97.4144	0.394	75.8434	76.4812	7.58434	7.64812			18	70.6107	7.06107
		0.201	97.4144	0.394	76.2207		7.62207				19	76.6568	7.66568
		0.2	97.4144	0.398	77.3795		7.73795				20	86.6729	8.66729
	8	0.205	96.7288	0.388	74.1171	73.6784	7.41171	7.36784			21	81.5425	8.15425
		0.201	96.7288	0.373	72.6697		7.26697				22	106.157	10.6157
		0.202	96.7288	0.383	74.2485		7.42485				23	81.2796	8.12796
	9	0.205	97.4207	0.476	90.2813	88.8505	9.02813	8.88505			24	78.4147	7.84147
		0.201	97.4207	0.458	88.596		8.8596				25	81.4736	8.14736
		0.204	97.4207	0.46	87.6743		8.76743				26	93.4252	9.34252
	10	0.205	96.4609	0.548	104.971	105.044	10.4971	10.5044			27	78.6052	7.86052
		0.2	96.4609	0.539	105.829		10.5829				28	72.0696	7.20696
		0.204	96.4609	0.542	104.331		10.4331				29	96.4632	9.64632
	11	0.204	97.2876	0.596	113.751	110.871	11.3751	11.0871			30	83.8964	8.38964
		0.2	97.2876	0.534	103.956		10.3956				31	73.8328	7.38328
		0.205	97.2876	0.605	114.905		11.4905				32	69.2352	6.92352
	12	0.201	96.6994	0.406	79.1229	79.0605	7.91229	7.90605			33	77.8051	7.78051
		0.199	96.6994	0.403	79.3276		7.93276				34	92.0032	9.20032
		0.202	96.6994	0.406	78.7312		7.87312				35	89.5798	8.95798
	13	0.2	97.4158	0.535	104.014	103.906	10.4014	10.3906			36	90.1897	9.01897
		0.2	97.4158	0.535	104.014		10.4014				37	85.4968	8.54968
		0.204	97.4158	0.544	103.69		10.369				38	75.538	7.5538
	14	0.201	97.2603	0.535	103.662	104.326	10.3662	10.4326			39	76.2788	7.62788
		0.201	97.2603	0.535	103.662		10.3662				40	85.4184	8.54184
		0.202	97.2603	0.548	105.655		10.5655				41	82.0466	8.20466
	15										42	46.5378	4.65378
											43	59.062	5.9062
											44	70.3784	7.03784
	16	0.205	96.7481	0.372	71.0465	71.0465	7.10465	7.10465			45	73.8982	7.38982
		0.205	96.7481	0.381	72.7654		7.27654				46	69.6228	6.96228
		0.205	96.7481	0.363	69.3276		6.93276				47	81.8095	8.18095
	17	0.199	97.8388	0.405	78.7928	78.2053	7.87928	7.82053			48	78.4851	7.84851
		0.203	97.8388	0.407	77.6217		7.76217				49	76.9762	7.69762
		0.201	97.8388	0.406	78.2014		7.82014				50	69.8877	6.98877
	18	0.202	97.7927	0.37	70.9479	70.6107	7.09479	7.06107			51	79.7468	7.97468
		0.205	97.7927	0.373	70.4765		7.04765				52	88.7584	8.87584
		0.203	97.7927	0.369	70.4076		7.04076				53	91.3664	9.13664
	19	0.199	98.0814	0.402	78.0158	76.6568	7.80158	7.66568			54	89.1141	8.91141
		0.205	98.0814	0.413	77.8047		7.78047				55	92.2579	9.22579
		0.2	98.0814	0.384	74.1499		7.41499				56	91.9096	9.19096
	20	0.201	96.6113	0.45	87.7778	86.6729	8.77778	8.66729			57	81.7376	8.17376
		0.2	96.6113	0.44	86.2563		8.62563				58	81.0974	8.10974
		0.202	96.6113	0.443	85.9846		8.59846				59	81.6504	8.16504
	21	0.201	96.1458	0.417	81.7346	81.5425	8.17346	8.15425			60	80.0228	8.00228
		0.201	96.1458	0.417	81.7346		8.17346				61	84.4463	8.44463
		0.2	96.1458	0.412	81.1583		8.11583				62	73.8366	7.38366
	22	0.201	96.749	0.541	105.378	106.157	10.5378	10.6157			63	86.0008	8.60008
		0.201	96.749	0.549	106.937		10.6937				64	81.9422	8.19422
		0.2	96.749	0.415	81.2396		8.12396				65	70.2169	7.02169
	23	0.201	96.92	0.42	81.665	81.2796	8.1665	8.12796			66	85.7943	8.57943
		0.201	96.92	0.421	81.8594		8.18594				67	100.874	10.0874
		0.2	96.92	0.411	80.3146		8.03146				68	104.463	10.4463
	24	0.201	96.9319	0.4	77.7667	78.4147	7.77667	7.84147			69	108.49	10.849
		0.201	96.9319	0.406	78.9332		7.89332				70	102.526	10.2526
		0.201	96.9319	0.404	78.5443		7.85443				71	110.181	11.0181
	25	0.201	97.6874	0.421	81.2164	81.4736	8.12164	8.14736			72	77.588	7.7588
		0.201	97.6874	0.422	81.4093		8.14093				73	80.1261	8.01261
		0.201	97.6874	0.424	81.7951		8.17951				74	93.5667	9.35667
	26	0.201	97.0917	0.471	91.4195	93.4252	9.14195	9.34252			75	80.1261	8.01261
		0.201	97.0917	0.487	94.5251		9.45251				76	87.3427	8.73427
		0.201	97.0917	0.486	94.331		9.4331				77	83.3065	8.33065
	27	0.201	97.1765	0.407	78.9284	78.6052	7.89284	7.86052			78	88.3753	8.83753
		0.201	97.1765	0.403	78.1527		7.81527				79	88.3753	8.83753
		0.201	97.1765	0.406	78.7345		7.87345				80	90.9507	9.09507
	28	0.201	96.3987	0.395	77.2193	72.0696	7.72193	7.20696			81	91.4926	9.14926
		0.202	96.3987	0.36	70.0287		7.00287				82	91.7346	9.17346
		0.2	96.3987	0.351	68.9608		6.89608				83	106.15	10.615
	29	0.201	97.4852	0.502	97.0432	96.4632	9.70432	9.64632			84	101.669	10.1669
		0.201	97.4852	0.496	95.8833		9.58833				85	94.0435	9.40435
		0.201	97.4852	0.473	91.4371		9.14371				86	110.849	11.0849
	30	0.201	97.4986	0.429	82.9199	83.8964	8.29199	8.38964
		0.201	97.4986	0.44	85.0461		8.50461
		0.2	97.4986	0.431	83.7231		8.37231
	31	0.2	97.3318	0.372	72.3859	73.8328	7.23859	7.38328
		0.202	97.3318	0.376	72.4399		7.24399
		0.201	97.3318	0.396	76.6726		7.66726
	32	0.201	97.5349	0.352	68.0115	69.2352	6.80115	6.92352
		0.201	97.5349	0.353	68.2047		6.82047
		0.201	97.5349	0.37	71.4894		7.14894
	33	0.201	97.2876	0.402	77.8697	77.8051	7.78697	7.78051
		0.201	97.2876	0.406	78.6445		7.86445
		0.201	97.2876	0.397	76.9012		7.69012
	34	0.201	97.2268	0.479	92.8431	92.0032	9.28431	9.20032
		0.201	97.2268	0.472	91.4863		9.14863
		0.201	97.2268	0.473	91.6801		9.16801
	35	0.201	97.613	0.469	90.5451	89.5798	9.05451	8.95798
		0.201	97.613	0.461	89.0006		8.90006
		0.201	97.613	0.462	89.1937		8.91937
	36	0.201	96.7481	0.456	88.8224	90.1897	8.88224	9.01897
		0.2	96.7481	0.47	92.0071		9.20071
		0.202	96.7481	0.463	89.7394		8.97394
	37	0.2	97.517	0.442	85.8436	85.4968	8.58436	8.54968
		0.2	97.517	0.443	86.0378		8.60378
		0.202	97.517	0.44	84.6091		8.46091
	38	0.202	98.3812	0.394	75.0981	75.538	7.50981	7.5538
		0.2	98.3812	0.398	76.6191		7.66191
		0.201	98.3812	0.391	74.897		7.4897
	39	0.201	98.0814	0.39	74.9339	76.2788	7.49339	7.62788
		0.201	98.0814	0.391	75.126		7.5126
		0.201	98.0814	0.41	78.7766		7.87766
	40	0.202	96.9666	0.448	86.6364	85.4184	8.66364	8.54184
		0.202	96.9666	0.452	87.4099		8.74099
		0.201	96.9666	0.423	82.2087		8.22087
	41	0.202	97.5557	0.419	80.5389	82.0466	8.05389	8.20466
		0.2	97.5557	0.424	82.315		8.2315
		0.2	97.5557	0.429	83.2857		8.32857
	42	0.2	97.0233	0.239	46.6539	46.5378	4.66539	4.65378
		0.201	97.0233	0.239	46.4218		4.64218
		0.201	97.0233	0.297	57.6873		5.76873
	43	0.2	96.8423	0.306	59.8442	59.062	5.98442	5.9062
		0.2	96.8423	0.299	58.4752		5.84752
		0.2	96.8423	0.301	58.8664		5.88664
	44	0.201	96.8262	0.354	68.8986	70.3784	6.88986	7.03784
		0.2	96.8262	0.362	70.8079		7.08079
		0.201	96.8262	0.367	71.4287		7.14287
	45	0.2	96.7265	0.378	74.0137	73.8982	7.40137	7.38982
		0.201	96.7265	0.378	73.6455		7.36455
		0.201	96.7265	0.38	74.0352		7.40352
	46	0.202	97.1591	0.354	68.3226	69.6228	6.83226	6.96228
		0.2	97.1591	0.355	69.2008		6.92008
		0.2	97.1591	0.366	71.345		7.1345
	47	0.2	97.2936	0.419	81.5635	81.8095	8.15635	8.18095
		0.201	97.2936	0.423	81.9325		8.19325
		0.201	97.2936	0.423	81.9325		8.19325
	48	0.201	96.2846	0.401	78.4851	78.4851	7.84851	7.84851
		0.201	96.2846	0.412	80.6381		8.06381
		0.201	96.2846	0.39	76.3322		7.63322
	49	0.201	96.2899	0.39	76.328	76.9762	7.6328	7.69762
		0.2	96.2899	0.387	76.1196		7.61196
		0.201	96.2899	0.401	78.4809		7.84809
	50	0.201	97.7578	0.362	69.7842	69.8877	6.97842	6.98877
		0.2	97.7578	0.36	69.7457		6.97457
		0.2	97.7578	0.362	70.1331		7.01331
	51	0.2	97.4518	0.414	80.4594	79.7468	8.04594	7.97468
		0.2	97.4518	0.401	77.9329		7.79329
		0.2	97.4518	0.416	80.8481		8.08481
	52	0.2	97.0702	0.449	87.6046	88.7584	8.76046	8.87584
		0.2	97.0702	0.464	90.5312		9.05312
		0.201	97.0702	0.454	88.1394		8.81394
	53	0.201	97.4575	0.471	91.0763	91.3664	9.10763	9.13664
		0.201	97.4575	0.474	91.6564		9.16564
		0.201	97.4575	0.451	87.209		8.7209
	54	0.201	96.7542	0.452	88.0377	89.1141	8.80377	8.91141
		0.2	96.7542	0.455	89.0651		8.90651
		0.2	96.7542	0.461	90.2396		9.02396
	55	0.201	97.2067	0.474	91.8929	92.2579	9.18929	9.22579
		0.202	97.2067	0.475	91.6309		9.16309
		0.201	97.2067	0.481	93.25		9.325
	56	0.202	96.6193	0.472	91.6058	91.9096	9.16058	9.19096
		0.201	96.6193	0.477	93.0367		9.30367
		0.201	96.6193	0.467	91.0863		9.10863
	57	0.202	96.6848	0.424	82.2341	81.7376	8.22341	8.17376
		0.2	96.6848	0.41	80.3141		8.03141
		0.2	96.6848	0.422	82.6647		8.26647
	58	0.202	97.2862	0.41	79.0274	81.0974	7.90274	8.10974
		0.201	97.2862	0.424	82.1324		8.21324
		0.201	97.2862	0.424	82.1324		8.21324
	59	0.201	97.0912	0.419	81.3269	81.6504	8.13269	8.16504
		0.201	97.0912	0.418	81.1328		8.11328
		0.201	97.0912	0.425	82.4915		8.24915
	60	0.201	96.6266	0.412	80.3527	80.0228	8.03527	8.00228
		0.202	96.6266	0.407	78.9846		7.89846
		0.202	96.6266	0.416	80.7311		8.07311
	61	0.201	96.9891	0.436	84.7157	84.4463	8.47157	8.44463
		0.201	96.9891	0.434	84.3271		8.43271
		0.202	96.9891	0.436	84.2963		8.42963
	62	0.201	96.7441	0.376	73.2425	73.8366	7.32425	7.38366
		0.202	96.7441	0.384	74.4306		7.44306
		0.202	96.7441	0.341	66.0959		6.60959
	63	0.201	97.4874	0.416	80.4164	86.0008	8.04164	8.60008
		0.201	97.4874	0.443	85.6358		8.56358
		0.202	97.4874	0.449	86.3659		8.63659
	64	0.201	97.4438	0.421	81.4194	81.9422	8.14194	8.19422
		0.2	97.4438	0.422	82.0209		8.20209
		0.201	97.4438	0.426	82.3864		8.23864
	65	0.2	97.3714	0.358	69.6334	70.2169	6.96334	7.02169
		0.2	97.3714	0.366	71.1894		7.11894
		0.2	97.3714	0.359	69.8279		6.98279
	66	0.2	96.9108	0.437	85.4034	85.7943	8.54034	8.57943
		0.2	96.9108	0.458	89.5075		8.95075
		0.2	96.9108	0.422	82.472		8.2472
	67	0.2	97.1939	0.507	98.795	100.874	9.8795	10.0874
		0.2	97.1939	0.536	104.446		10.4446
		0.2	97.1939	0.51	99.3796		9.93796
	68	0.199	96.9563	0.533	104.639	104.463	10.4639	10.4463
		0.201	96.9563	0.54	104.959		10.4959
		0.201	96.9563	0.534	103.792		10.3792
	69	0.202	97.1014	0.561	108.338	108.49	10.8338	10.849
		0.201	97.1014	0.559	108.489		10.8489
		0.2	97.1014	0.557	108.641		10.8641
	70	0.2	97.168	0.522	101.745	102.526	10.1745	10.2526
		0.201	97.168	0.529	102.596		10.2596
		0.199	97.168	0.527	103.236		10.3236
	71	0.2	97.1361	0.568	110.747	110.181	11.0747	11.0181
		0.201	97.1361	0.565	109.614		10.9614
		0.202	97.1361	0.482	93.0489		9.30489
	72	0.202	97.7968	0.417	79.957	77.588	7.9957	7.7588
		0.199	97.7968	0.407	79.216		7.9216
		0.2	97.7968	0.38	73.5911		7.35911
	73	0.2	97.3734	0.408	79.3571	80.1261	7.93571	8.01261
		0.201	97.3734	0.421	81.4783		8.14783
		0.201	97.3734	0.411	79.5429		7.95429
	74	0.2	96.9573	0.48	93.762	93.5667	9.3762	9.35667
		0.202	96.9573	0.504	97.4753		9.74753
		0.2	96.9573	0.478	93.3713		9.33713
	75	0.202	96.9952	0.444	85.8376	85.4019	8.58376	8.54019
		0.199	96.9952	0.44	86.3466		8.63466
		0.198	96.9952	0.426	84.0214		8.40214
	76	0.2	97.3941	0.45	87.5077	87.3427	8.75077	8.73427
		0.2	97.3941	0.443	86.1464		8.61464
		0.202	97.3941	0.459	88.3741		8.83741
	77	0.2	97.1525	0.427	83.2415	83.3065	8.32415	8.33065
		0.2	97.1525	0.433	84.4112		8.44112
		0.2	97.1525	0.422	82.2668		8.22668
	78	0.2	97.3074	0.453	88.1695	88.3753	8.81695	8.83753
		0.201	97.3074	0.455	88.1182		8.81182
		0.202	97.3074	0.461	88.8382		8.88382
	79	0.201	96.9184	0.385	74.8608	73.3052	7.48608	7.33052
		0.201	96.9184	0.375	72.9163		7.29163
		0.201	96.9184	0.371	72.1386		7.21386
	80	0.2	97.0622	0.466	90.9288	90.9507	9.09288	9.09507
		0.2	97.0622	0.466	90.9288		9.09288
		0.202	97.0622	0.471	90.9945		9.09945
	81	0.2	97.2537	0.498	96.9816	91.4926	9.69816	9.14926
		0.201	97.2537	0.477	92.4298		9.24298
		0.201	97.2537	0.439	85.0665		8.50665
	82	0.2	97.2814	0.477	92.8655	91.7346	9.28655	9.17346
		0.2	97.2814	0.451	87.8037		8.78037
		0.201	97.2814	0.488	94.5344		9.45344
	83	0.201	97.1513	0.546	105.912	106.15	10.5912	10.615
		0.199	97.1513	0.543	106.388		10.6388
		0.199	97.1513	0.508	99.5309		9.95309
	84	0.2	97.054	0.509	99.3277	101.669	9.93277	10.1669
		0.2	97.054	0.523	102.06		10.206
		0.2	97.054	0.531	103.621		10.3621
	85	0.201	96.9692	0.431	83.7614	94.0435	8.37614	9.40435
		0.2	96.9692	0.48	93.7505		9.37505
		0.2	96.9692	0.483	94.3365		9.43365
	86	0.201	97.3979	0.572	110.674	110.849	11.0674	11.0849
		0.2	97.3979	0.564	109.672		10.9672
		0.2	97.3979	0.577	112.2		11.22

## Sheet: amino acid content
	Repeat each sample 3 times
	Measurement of amino acid									amino acid proportion in dry tea
	sample number	tea powder weight (g)	dry matter weight(%)	absorbance	amino acid content (mg/ml)	average content (g/kg)	amino acid proportion (%)	average proportion (%)
	1	1.001	96.9473	0.235	0.094628	0.0929008	0.975101	0.958253			sample number	average proportion (%)
		0.999	96.9473	0.227	0.0921896		0.951876				1	0.958253
		1	96.9473	0.226	0.0918848		0.947781				2	1.04997
	2	1	97.8654	0.26	0.102248	0.102756	1.04478	1.04997			3	0.961951
		1	97.8654	0.257	0.101334		1.03544				4	0.884802
		1	97.8654	0.268	0.104686		1.0697				5	0.948833
	3	1.001	96.0895	0.23	0.093104	0.0924944	0.967962	0.961951			6	0.917071
		1.001	96.0895	0.221	0.0903608		0.939443				7	0.976677
		1	96.0895	0.233	0.0940184		0.978447				8	0.744854
	4	1	96.9264	0.207	0.0860936	0.0857888	0.888237	0.884802			9	0.755203
		1.001	96.9264	0.202	0.0845696		0.871642				10	0.840072
		1	96.9264	0.209	0.0867032		0.894526				11	0.919092
	5	1.001	96.5609	0.226	0.0918848	0.0916816	0.950623	0.948833			12	0.740075
		1.001	96.5609	0.228	0.0924944		0.95693				13	0.843583
		1	96.5609	0.222	0.0906656		0.938947				14	0.944835
	6	1	97.0917	0.215	0.088532	0.08904	0.911839	0.917071			15
		1	97.0917	0.215	0.088532		0.911839				16	0.805057
		1	97.0917	0.22	0.090056		0.927536				17	0.993144
	7	1.001	97.4144	0.236	0.0949328	0.0952376	0.973551	0.976677			18	0.739618
		1.001	97.4144	0.238	0.0955424		0.979803				19	0.954035
		1	97.4144	0.217	0.0891416		0.915076				20	1.0184
	8	1.001	96.7288	0.161	0.0720728	0.0720728	0.744358	0.744854			21	1.09798
		1	96.7288	0.164	0.0729872		0.754555				22	0.958125
		1	96.7288	0.158	0.0711584		0.735649				23	1.09861
	9	1	97.4207	0.165	0.073292	0.0735968	0.752325	0.755203			24	1.00805
		1.001	97.4207	0.165	0.073292		0.751573				25	1.05674
		1	97.4207	0.168	0.0742064		0.761711				26	1.0416
	10	1.001	96.4609	0.193	0.0818264	0.0811152	0.847438	0.840072			27	1.06054
		1.001	96.4609	0.19	0.080912		0.837968				28	1.03011
		1.001	96.4609	0.189	0.0806072		0.834811				29	1.28648
	11	1	97.2876	0.212	0.0876176	0.0894464	0.900604	0.919092			30	1.18275
		1	97.2876	0.22	0.090056		0.925668				31	1.31982
		1.001	97.2876	0.222	0.0906656		0.931003				32	1.16668
	12	1	96.6994	0.156	0.0705488	0.0715648	0.729568	0.740075			33	1.14393
		1	96.6994	0.16	0.071768		0.742176				34	1.27883
		1	96.6994	0.162	0.0723776		0.74848				35	1.45654
	13	1.001	97.4158	0.193	0.0818264	0.0822328	0.839131	0.843583			36	1.12091
		1.001	97.4158	0.193	0.0818264		0.839131				37	1.17627
		1	97.4158	0.197	0.0830456		0.852486				38	0.850317
	14	1.002	97.2603	0.225	0.09158	0.0919864	0.939718	0.944835			39	0.957139
		1.001	97.2603	0.226	0.0918848		0.943787				40	0.92978
		1	97.2603	0.228	0.0924944		0.950999				41	1.09705
	15										42	1.04338
											43	0.822913
											44	0.856341
	16	1.001	96.7481	0.178	0.0772544	0.0779656	0.797713	0.805057			45	0.894114
		1.001	96.7481	0.179	0.0775592		0.800861				46	0.994863
		1.001	96.7481	0.184	0.0790832		0.816597				47	0.801075
	17	1	97.8388	0.251	0.0995048	0.097168	1.01703	0.993144			48	0.845337
		1	97.8388	0.244	0.0973712		0.99522				49	0.680744
		1	97.8388	0.235	0.094628		0.967182				50	0.759084
	18	1.001	97.7927	0.163	0.0726824	0.0723776	0.742486	0.739618			51	0.910555
		1.001	97.7927	0.162	0.0723776		0.739373				52	0.894248
		1	97.7927	0.161	0.0720728		0.736995				53	0.984191
	19	1.002	98.0814	0.233	0.0940184	0.0937136	0.956662	0.954035			54	1.01793
		1.001	98.0814	0.231	0.0934088		0.951409				55	1.00483
		1	98.0814	0.18	0.077864		0.793871				56	1.27845
	20	1	96.6113	0.25	0.0992	0.098438	1.0268	1.0184			57	1.1353
		1.001	96.6113	0.245	0.097676		1.01001				58	1.04683
		1	96.6113	0.214	0.0882272		0.913218				59	1.03007
	21	1	96.1458	0.272	0.105906	0.105601	1.10151	1.09798			60	1.01367
		1.001	96.1458	0.264	0.103467		1.07507				61	0.976374
		1	96.1458	0.277	0.10743		1.11736				62	0.867857
	22	1	96.749	0.231	0.0934088	0.0926976	0.965476	0.958125			63	0.939403
		1	96.749	0.229	0.0927992		0.959175				64	1.0639
		1	96.749	0.226	0.0918848		0.949724				65	1.09599
	23	1.002	96.92	0.251	0.0995048	0.106617	1.02462	1.09861			66	0.937967
		1.001	96.92	0.279	0.108039		1.11361				67	0.881903
		1.001	96.92	0.293	0.112306		1.1576				68	0.893494
	24	1.002	96.9319	0.246	0.0979808	0.0977776	1.0088	1.00805			69	1.01638
		1	96.9319	0.246	0.0979808		1.01082				70	0.825108
		1	96.9319	0.244	0.0973712		1.00453				71	0.767081
	25	1	97.6874	0.267	0.104382	0.103264	1.06853	1.05674			72	0.979026
		1.001	97.6874	0.26	0.102248		1.04564				73	0.927558
		1	97.6874	0.263	0.103162		1.05605				74	0.935855
	26	1.001	97.0917	0.253	0.100114	0.101232	1.0301	1.0416			75	0.927558
		1.002	97.0917	0.258	0.101638		1.04474				76	0.982755
		1	97.0917	0.259	0.101943		1.04997				77	0.892152
	27	1.001	97.1765	0.233	0.0940184	0.103162	0.966535	1.06054			78	1.1068
		1.001	97.1765	0.263	0.103162		1.06054				79	1.1068
		1.001	97.1765	0.263	0.103162		1.06054				80	1.25315
	28	1	96.3987	0.25	0.0992	0.0993016	1.02906	1.03011			81	0.93467
		1	96.3987	0.25	0.0992		1.02906				82	0.961963
		1	96.3987	0.251	0.0995048		1.03222				83	1.17861
	29	1	97.4852	0.337	0.125718	0.125413	1.28961	1.28648			84	0.979714
		1	97.4852	0.336	0.125413		1.28648				85	0.956268
		1	97.4852	0.335	0.125108		1.28335				86	1.04667
	30	1.001	97.4986	0.299	0.114135	0.115354	1.16947	1.18275
		1	97.4986	0.3	0.11444		1.17376
		1	97.4986	0.31	0.117488		1.20502
	31	1	97.3318	0.348	0.12907	0.128461	1.32609	1.31982
		1	97.3318	0.344	0.127851		1.31356
		1	97.3318	0.346	0.128461		1.31982
	32	1	97.5349	0.293	0.112306	0.11383	1.15145	1.16668
		1	97.5349	0.301	0.114745		1.17645
		1.001	97.5349	0.3	0.11444		1.17215
	33	1	97.2876	0.291	0.111697	0.11129	1.14811	1.14393
		1	97.2876	0.29	0.111392		1.14498
		1	97.2876	0.288	0.110782		1.13871
	34	1	97.2268	0.331	0.123889	0.124295	1.27422	1.27883
		0.999	97.2268	0.332	0.124194		1.27864
		1	97.2268	0.334	0.124803		1.28363
	35	1	97.613	0.395	0.143396	0.142177	1.46903	1.45654
		1	97.613	0.39	0.141872		1.45341
		1	97.613	0.388	0.141262		1.44717
	36	1	96.7481	0.285	0.109868	0.108446	1.13561	1.12091
		1	96.7481	0.277	0.10743		1.11041
		1	96.7481	0.279	0.108039		1.11671
	37	1	97.517	0.3	0.11444	0.114745	1.17354	1.17627
		1.001	97.517	0.301	0.114745		1.17549
		1	97.517	0.302	0.11505		1.17979
	38	1	98.3812	0.199	0.0836552	0.0836552	0.850317	0.850317
		1	98.3812	0.197	0.0830456		0.84412
		1	98.3812	0.201	0.0842648		0.856513
	39	0.999	98.0814	0.232	0.0937136	0.0938152	0.956424	0.957139
		0.999	98.0814	0.23	0.093104		0.950203
		1	98.0814	0.235	0.094628		0.964791
	40	1	96.9666	0.22	0.090056	0.0901576	0.928732	0.92978
		1	96.9666	0.223	0.0909704		0.938162
		1	96.9666	0.218	0.0894464		0.922445
	41	1	97.5557	0.277	0.10743	0.107023	1.10121	1.09705
		1	97.5557	0.277	0.10743		1.10121
		1	97.5557	0.273	0.10621		1.08872
	42	1	97.0233	0.26	0.102248	0.101232	1.05385	1.04338
		1	97.0233	0.255	0.100724		1.03814
		1	97.0233	0.255	0.100724		1.03814
	43	1	96.8423	0.188	0.0803024	0.0796928	0.829208	0.822913
		1	96.8423	0.185	0.079388		0.819765
		1	96.8423	0.185	0.079388		0.819765
	44	1.001	96.8262	0.198	0.0833504	0.082944	0.859965	0.856341
		1	96.8262	0.197	0.0830456		0.857677
		1	96.8262	0.195	0.082436		0.851381
	45	0.998	96.7265	0.206	0.0857888	0.0863984	0.888699	0.894114
		0.999	96.7265	0.208	0.0863984		0.894118
		1	96.7265	0.21	0.087008		0.899526
	46	1	97.1591	0.245	0.097676	0.09666	1.00532	0.994863
		1	97.1591	0.24	0.096152		0.989635
		1	97.1591	0.24	0.096152		0.989635
	47	1.001	97.2936	0.182	0.0784736	0.0779656	0.805759	0.801075
		1	97.2936	0.18	0.077864		0.800299
		1	97.2936	0.179	0.0775592		0.797167
	48	1.001	96.2846	0.191	0.0812168	0.08142	0.842665	0.845337
		1	96.2846	0.191	0.0812168		0.843507
		1	96.2846	0.193	0.0818264		0.849839
	49	1.001	96.2899	0.138	0.0650624	0.0655704	0.675018	0.680744
		1	96.2899	0.133	0.0635384		0.659866
		1	96.2899	0.148	0.0681104		0.707348
	50	1	97.7578	0.166	0.0735968	0.0742064	0.752848	0.759084
		1	97.7578	0.168	0.0742064		0.759084
		1	97.7578	0.17	0.074816		0.76532
	51	1	97.4518	0.215	0.088532	0.0887352	0.90847	0.910555
		1	97.4518	0.216	0.0888368		0.911597
		1	97.4518	0.216	0.0888368		0.911597
	52	1	97.0702	0.209	0.0867032	0.0868048	0.893201	0.894248
		1	97.0702	0.21	0.087008		0.896341
		1	97.0702	0.209	0.0867032		0.893201
	53	1	97.4575	0.24	0.096152	0.0959488	0.986604	0.984191
		1.001	97.4575	0.24	0.096152		0.985619
		1	97.4575	0.238	0.0955424		0.980349
	54	1	96.7542	0.25	0.0992	0.0984888	1.02528	1.01793
		1	96.7542	0.248	0.0985904		1.01898
		1	96.7542	0.245	0.097676		1.00953
	55	1	97.2067	0.23	0.093104	0.097676	0.957794	1.00483
		1	97.2067	0.228	0.0924944		0.951522
		1	97.2067	0.277	0.10743		1.10517
	56	0.999	96.6193	0.328	0.122974	0.123482	1.27405	1.27845
		1	96.6193	0.33	0.123584		1.27908
		1	96.6193	0.331	0.123889		1.28224
	57	1	96.6848	0.29	0.111392	0.109766	1.15211	1.1353
		1	96.6848	0.282	0.108954		1.12689
		1	96.6848	0.282	0.108954		1.12689
	58	1	97.2862	0.26	0.102248	0.101842	1.051	1.04683
		1	97.2862	0.258	0.101638		1.04474
		1	97.2862	0.258	0.101638		1.04474
	59	0.998	97.0912	0.251	0.0995048	0.0999112	1.02691	1.03007
		0.999	97.0912	0.252	0.0998096		1.02903
		1	97.0912	0.254	0.100419		1.03428
	60	1.001	96.6266	0.252	0.0998096	0.0979808	1.03191	1.01367
		1	96.6266	0.238	0.0955424		0.988779
		1	96.6266	0.248	0.0985904		1.02032
	61	1.001	96.9891	0.24	0.096152	0.0947296	0.990379	0.976374
		1	96.9891	0.233	0.0940184		0.969371
		1	96.9891	0.233	0.0940184		0.969371
	62	1	96.7441	0.199	0.0836552	0.08396	0.864706	0.867857
		1	96.7441	0.2	0.08396		0.867857
		1	96.7441	0.201	0.0842648		0.871007
	63	1	97.4874	0.225	0.09158	0.09158	0.939403	0.939403
		1	97.4874	0.225	0.09158		0.939403
		1	97.4874	0.201	0.0842648		0.864366
	64	1	97.4438	0.264	0.103467	0.10367	1.06181	1.0639
		1	97.4438	0.264	0.103467		1.06181
		1	97.4438	0.266	0.104077		1.06807
	65	1	97.3714	0.276	0.107125	0.106718	1.10017	1.09599
		1	97.3714	0.274	0.106515		1.09391
		1	97.3714	0.274	0.106515		1.09391
	66	0.999	96.9108	0.223	0.0909704	0.0908688	0.939642	0.937967
		1	96.9108	0.223	0.0909704		0.938702
		1	96.9108	0.222	0.0906656		0.935557
	67	0.999	97.1939	0.204	0.0851792	0.0856872	0.877261	0.881903
		1	97.1939	0.205	0.085484		0.87952
		1	97.1939	0.208	0.0863984		0.888928
	68	1	96.9563	0.218	0.0894464	0.0866016	0.922543	0.893494
		0.999	96.9563	0.203	0.0848744		0.876264
		1	96.9563	0.205	0.085484		0.881675
	69	1	97.1014	0.248	0.0985904	0.098692	1.01533	1.01638
		1	97.1014	0.248	0.0985904		1.01533
		1	97.1014	0.249	0.0988952		1.01847
	70	1.001	97.168	0.188	0.0803024	0.0802008	0.825603	0.825108
		1	97.168	0.185	0.079388		0.817018
		1	97.168	0.19	0.080912		0.832702
	71	1	97.1361	0.17	0.074816	0.0745112	0.770218	0.767081
		1	97.1361	0.168	0.0742064		0.763943
		1	97.1361	0.169	0.0745112		0.767081
	72	1	97.7968	0.238	0.0955424	0.0957456	0.976948	0.979026
		1	97.7968	0.239	0.0958472		0.980065
		1	97.7968	0.239	0.0958472		0.980065
	73	0.999	97.3734	0.226	0.0918848	0.0902592	0.944578	0.927558
		0.999	97.3734	0.216	0.0888368		0.913244
		1	97.3734	0.22	0.090056		0.924852
	74	1.001	96.9573	0.213	0.0879224	0.0907672	0.90591	0.935855
		1	96.9573	0.234	0.0943232		0.972833
		1	96.9573	0.22	0.090056		0.928821
	75	1.001	96.9952	0.217	0.0891416	0.0894464	0.918113	0.921714
		1	96.9952	0.199	0.0836552		0.862467
		1	96.9952	0.219	0.0897512		0.925316
	76	1	97.3941	0.247	0.0982856	0.0957456	1.00915	0.982755
		1.001	97.3941	0.231	0.0934088		0.958123
		1	97.3941	0.238	0.0955424		0.980988
	77	1.001	97.1525	0.204	0.0851792	0.0867032	0.875882	0.892152
		1	97.1525	0.214	0.0882272		0.908131
		1	97.1525	0.209	0.0867032		0.892444
	78	1	97.3074	0.288	0.110782	0.107734	1.13848	1.1068
		1.001	97.3074	0.269	0.104991		1.07789
		1	97.3074	0.277	0.10743		1.10402
	79	1.001	96.9184	0.272	0.105906	0.10489	1.09164	1.08188
		1	96.9184	0.268	0.104686		1.08015
		1	96.9184	0.266	0.104077		1.07386
	80	1.002	97.0622	0.324	0.121755	0.121755	1.2519	1.25315
		1	97.0622	0.307	0.116574		1.20102
		1	97.0622	0.324	0.121755		1.2544
	81	0.999	97.2537	0.233	0.0940184	0.0908688	0.967701	0.93467
		1	97.2537	0.216	0.0888368		0.913454
		1	97.2537	0.219	0.0897512		0.922856
	82	1.001	97.2814	0.229	0.0927992	0.093612	0.952972	0.961963
		1	97.2814	0.236	0.0949328		0.975858
		1	97.2814	0.23	0.093104		0.957059
	83	1.001	97.1513	0.297	0.113526	0.114542	1.16738	1.17861
		1	97.1513	0.304	0.115659		1.19051
		1	97.1513	0.3	0.11444		1.17796
	84	1.001	97.054	0.216	0.0888368	0.0950852	0.914419	0.979714
		1	97.054	0.235	0.094628		0.975004
		1	97.054	0.238	0.0955424		0.984425
	85	0.999	96.9692	0.228	0.0924944	0.0926976	0.954809	0.956268
		1	96.9692	0.228	0.0924944		0.953854
		1	96.9692	0.23	0.093104		0.96014
	86	1	97.3979	0.256	0.101029	0.101943	1.03728	1.04667
		1	97.3979	0.261	0.102553		1.05293
		1	97.3979	0.26	0.102248		1.0498
